# Supplementary material for: Efficacy and Safety of the Novel Dipeptidyl Peptidase-4 Inhibitor Gemigliptin in the Management of Type 2 Diabetes: A Meta-Analysis
Source: PubMed Central journal article supplement — Endocrinol Metab (Seoul). 2021 Apr 6;36(2):374–87. doi: 10.3803/EnM.2020.818 (PMC8090470; doi:10.3803/enm.2020.818), 2021-04-06
Supplement: enm-2020-818-suppl1.pdf [file enm-2020-818-suppl1.pdf]

**Supplemental Table S1.** Risk of Bias Assessment Table

| Study                                                  | Risk of bias | Author judgement                                                                                                                    |
|--------------------------------------------------------|--------------|-------------------------------------------------------------------------------------------------------------------------------------|
| Ahn et al. (2017) [15]                                 |              |                                                                                                                                     |
| Random sequence generation (selection bias)            | Low risk     | Randomized double blinded placebo controlled, parallel group study                                                                  |
| Allocation concealment (selection bias)                | Low risk     | Stratified block randomization was done.                                                                                            |
| Blinding of participants & personal (performance bias) | Low risk     | Yes, double blinded RCT.                                                                                                            |
| Blinding of outcome assessment (detection bias)        | Low risk     | Yes, double blinded RCT.                                                                                                            |
| Incomplete outcome data (attrition bias)               | Low risk     | 219 Patients were randomized, of which data from 216 patients were analysed after 24 weeks follow-up (attrition rate 0.01%).        |
| Selective reporting (reporting bias)                   | Low risk     | All pre-specified outcomes were reported.                                                                                           |
| Other biases                                           | High risk    | The study was funded by LG Life Sciences Ltd. One of the authors is an employee of LG Life science.                                 |
| Bae et al. (2019) [20]                                 |              |                                                                                                                                     |
| Random sequence generation (selection bias)            | Low risk     | Randomized, double-blind, multicentre, parallel group, phase 3 trial                                                                |
| Allocation concealment (selection bias)                | Low risk     | Randomization done using random sequence generated by a blinded statistician with use of an interactive web response system (IWRS). |
| Blinding of participants & personel (performance bias) | Low risk     | Double blind RCT                                                                                                                    |
| Blinding of outcome assessment (detection bias)        | Low risk     | Double blind RCT                                                                                                                    |
| Incomplete outcome data (attrition bias)               | Low risk     | 290 Patients were randomized, of which 267 patients completed the study. Hence attrition rate was 7.93%.                            |
| Selective reporting (reporting bias)                   | Low risk     | All Pre-specified outcomes were reported.                                                                                           |
| Other biases                                           | High risk    | The sponsor (LG Chem Ltd.) and all authors agreed on the study design. The sponsor was involved in data analysis.                   |
| Cho et al. (2020) [16]                                 |              |                                                                                                                                     |
| Random sequence generation (selection bias)            | Low risk     | Placebo-controlled, randomized, double-blind, parallel-group, phase 3 clinical trial                                                |
| Allocation concealment (selection bias)                | Low risk     | Randomized 2:1, using an interactive web response system                                                                            |
| Blinding of participants & personel (performance bias) | Low risk     | Double blind RCT                                                                                                                    |
| Blinding of outcome assessment (detection bias)        | Low risk     | Double blind RCT                                                                                                                    |
| Incomplete outcome data (attrition bias)               | Low risk     | 290 Patients were randomized out of which 281 patients completed the study. Hence the attrition rate was 3.1%.                      |
| Selective reporting (reporting bias)                   | Low risk     | All pre-specified outcomes were reported.                                                                                           |
| Other biases                                           | Low risk     | Nothing significant noted.                                                                                                          |
| Han et al. (2018) [21]                                 |              |                                                                                                                                     |
| Random sequence generation (selection bias)            | Low risk     | Randomized, multicentre, double-blinded, placebo-controlled clinical trial                                                          |
| Allocation concealment (selection bias)                | Low risk     | Randomization codes were prepared by a statistician.                                                                                |
| Blinding of participants & personel (performance bias) | Low risk     | Double blind RCT                                                                                                                    |
| Blinding of outcome assessment (detection bias)        | Low risk     | Double blind RCT                                                                                                                    |
| Incomplete outcome data (attrition bias)               | Low risk     | 121 Patients from the initially randomized 132 patients completed the 12 week double blind RCT.                                     |
| Selective reporting (reporting bias)                   | Low risk     | All pre-specified outcomes were reported.                                                                                           |
| Other biases                                           | High risk    | LG Life Sciences funded and coordinated the study. Three out of 17 authors were employees of LG Life Sciences.                      |

*(Continued to the next page)*

Supplemental Table S1. Continued

| Study                                                   | Risk of bias | Author judgement                                                                                                                                                                                       |
|---------------------------------------------------------|--------------|--------------------------------------------------------------------------------------------------------------------------------------------------------------------------------------------------------|
| Kwak et al. (2020) [11]                                 |              |                                                                                                                                                                                                        |
| Random sequence generation (selection bias)             | Low risk     | 12-Week, phase 4, multicentre, parallel group, randomized, open-labelled study                                                                                                                         |
| Allocation concealment (selection bias)                 | Low risk     | Randomization was performed using the interactive web response system (cubeIWRS, CRScube Inc.).                                                                                                        |
| Blinding of participants & personnel (performance bias) | High risk    | Open labelled study                                                                                                                                                                                    |
| Blinding of outcome assessment (detection bias)         | High risk    | Open labelled study                                                                                                                                                                                    |
| Incomplete outcome data (attrition bias)                | Low risk     | 67 Patients from the initially randomized 71 patients completed the study. Hence attrition rate was 5.63%.                                                                                             |
| Selective reporting (reporting bias)                    | Low risk     | All pre-specified outcomes were reported.                                                                                                                                                              |
| Other biases                                            | High risk    | One of the authors was an employee of LG Chem Ltd. This study was coordinated and funded by LG Chem Ltd.                                                                                               |
| Lim et al. (2017) [12]                                  |              |                                                                                                                                                                                                        |
| Random sequence generation (selection bias)             | Low risk     | Randomized, parallel group, double-blind, phase III trial                                                                                                                                              |
| Allocation concealment (selection bias)                 | Low risk     | Stratified block randomization                                                                                                                                                                         |
| Blinding of participants & personnel (performance bias) | Low risk     | Double blind RCT                                                                                                                                                                                       |
| Blinding of outcome assessment (detection bias)         | Low risk     | Double blind RCT                                                                                                                                                                                       |
| Incomplete outcome data (attrition bias)                | Low risk     | From the initially randomized 433 patients, data from 389 patients completed the 24 week study. Hence the attrition rate was only 10.6%. Any attrition rate of less than 20% was considered to be low. |
| Selective reporting (reporting bias)                    | Low risk     | All pre-specified outcomes were reported.                                                                                                                                                              |
| Other biases                                            | High risk    | The study was funded by LG Life Sciences Ltd. One of the authors was an employee of LG Life Sciences Ltd.                                                                                              |
| Park et al. (2017) [14]                                 |              |                                                                                                                                                                                                        |
| Random sequence generation (selection bias)             | Low risk     | RCT; open labelled trial                                                                                                                                                                               |
| Allocation concealment (selection bias)                 | Unclear risk | Randomization method has not been clearly elaborated in the manuscript or the supplementary material.                                                                                                  |
| Blinding of participants & personnel (performance bias) | High risk    | Open labelled study                                                                                                                                                                                    |
| Blinding of outcome assessment (detection bias)         | High risk    | Open labelled study                                                                                                                                                                                    |
| Incomplete outcome data (attrition bias)                | Low risk     | 69 Patients were randomized of which 66 patients completed the study.                                                                                                                                  |
| Selective reporting (reporting bias)                    | Low risk     | All pre-specified outcomes were reported.                                                                                                                                                              |
| Other biases                                            | High risk    | LG Life Sciences coordinated and funded this study.                                                                                                                                                    |
| Rhee et al. (2010) [17]                                 |              |                                                                                                                                                                                                        |
| Random sequence generation (selection bias)             | Low risk     | RCT; double blinded; parallel group                                                                                                                                                                    |
| Allocation concealment (selection bias)                 | Unclear risk | Randomization method has not been clearly elaborated in the manuscript or the supplementary material.                                                                                                  |
| Blinding of participants & personnel (performance bias) | Low risk     | Double blinded study                                                                                                                                                                                   |
| Blinding of outcome assessment (detection bias)         | Low risk     | Double blinded study                                                                                                                                                                                   |
| Incomplete outcome data (attrition bias)                | Low risk     | From the initially randomized 145 patients, data from 141 patients were analysed at the end of the study. Hence the attrition rate was 2.75%.                                                          |
| Selective reporting (reporting bias)                    | Low risk     | All pre-specified outcomes were reported.                                                                                                                                                              |
| Other biases                                            | High risk    | This study was supported by LG Life Sciences Ltd. One of the authors was an employee of LG Life Sciences Ltd.                                                                                          |

(Continued to the next page)

Supplemental Table S1. Continued

| Study                                                   | Risk of bias | Author judgement                                                                                                                                                                                    |
|---------------------------------------------------------|--------------|-----------------------------------------------------------------------------------------------------------------------------------------------------------------------------------------------------|
| Rhee et al. (2013) [13]                                 |              |                                                                                                                                                                                                     |
| Random sequence generation (selection bias)             | Low risk     | Randomized, active-controlled, parallel group, double-blind, phase III trial                                                                                                                        |
| Allocation concealment (selection bias)                 | Unclear risk | Randomization method unclear                                                                                                                                                                        |
| Blinding of participants & personnel (performance bias) | Low risk     | Double blinded study                                                                                                                                                                                |
| Blinding of outcome assessment (detection bias)         | Low risk     | Double blinded study                                                                                                                                                                                |
| Incomplete outcome data (attrition bias)                | Low risk     | From the initially randomized 425 patients, 90% completed the study. Hence the attrition rate was 10%.                                                                                              |
| Selective reporting (reporting bias)                    | Low risk     | All pre-specified outcomes were reported.                                                                                                                                                           |
| Other biases                                            | High risk    | This study was supported by LG Life Sciences Ltd. One of the authors was from LG Life Sciences Ltd.                                                                                                 |
| Yang et al. (2013) [18]                                 |              |                                                                                                                                                                                                     |
| Random sequence generation (selection bias)             | Low risk     | Double blinded placebo controlled, parallel group trial                                                                                                                                             |
| Allocation concealment (selection bias)                 | Unclear risk | Method of randomization not clear                                                                                                                                                                   |
| Blinding of participants & personnel (performance bias) | Low risk     | Double blinded study                                                                                                                                                                                |
| Blinding of outcome assessment (detection bias)         | Low risk     | Double blinded study                                                                                                                                                                                |
| Incomplete outcome data (attrition bias)                | Low risk     | From initially randomized 182 patients, data from 167 patients were analysed at the end. Hence the attrition rate was only 8.24%.                                                                   |
| Selective reporting (reporting bias)                    | Low risk     | All pre-specified outcomes were reported.                                                                                                                                                           |
| Other biases                                            | High risk    | The study was funded by LG Life Sciences Ltd. Dr. Mita Nandy and Dr. Deepali Mittal (LG Life Sciences) contributed managing India sites. One of the authors is an employee of LG Life Sciences Ltd. |
| Yoon et al. (2017) [19]                                 |              |                                                                                                                                                                                                     |
| Random sequence generation (selection bias)             | Low risk     | RCT; double blind                                                                                                                                                                                   |
| Allocation concealment (selection bias)                 | Low risk     | Randomization codes were generated by a statistician using SAS software version 9.2. Interactive web response system was used for randomization.                                                    |
| Blinding of participants & personnel (performance bias) | Low risk     | Double blinded study                                                                                                                                                                                |
| Blinding of outcome assessment (detection bias)         | Low risk     | Double blinded study                                                                                                                                                                                |
| Incomplete outcome data (attrition bias)                | Low risk     | From the initially randomized 132 patients, data from 121 patients were analysed at the end of the study. Hence the attrition rate was 8.33%.                                                       |
| Selective reporting (reporting bias)                    | Low risk     | All pre-specified outcomes were reported.                                                                                                                                                           |
| Other biases                                            | High risk    | LG Life Sciences for coordination and funding of the study. One of the authors is an employee of LG Life Sciences.                                                                                  |

RCT, randomized controlled trial.
