# Supplementary material for: Efficacy and Safety of the Novel Dipeptidyl Peptidase-4 Inhibitor Gemigliptin in the Management of Type 2 Diabetes: A Meta-Analysis
Source: PubMed Central journal article supplement — Endocrinol Metab (Seoul). 2021 Apr 6;36(2):374–87. doi: 10.3803/EnM.2020.818 (PMC8090470; doi:10.3803/enm.2020.818), 2021-04-06
Supplement: enm-2020-818-suppl2.pdf [file enm-2020-818-suppl2.pdf]

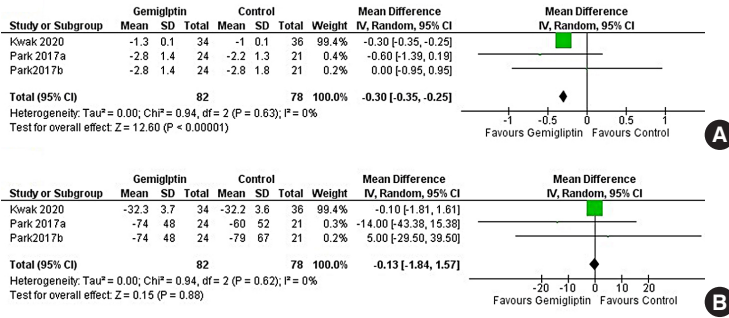

**Supplemental Fig. S1.** Forest plot highlighting the impact of gemigliptin as compared to the active control group after 12 weeks of therapy on (A) haemoglobin A1c, (B) fasting glucose. SD, standard deviation; IV, inverse variance; CI, confidence interval.
