# Supplementary material for: Efficacy and Safety of the Novel Dipeptidyl Peptidase-4 Inhibitor Gemigliptin in the Management of Type 2 Diabetes: A Meta-Analysis
Source: PubMed Central journal article supplement — Endocrinol Metab (Seoul). 2021 Apr 6;36(2):374–87. doi: 10.3803/EnM.2020.818 (PMC8090470; doi:10.3803/enm.2020.818), 2021-04-06
Supplement: enm-2020-818-suppl3.pdf [file enm-2020-818-suppl3.pdf]

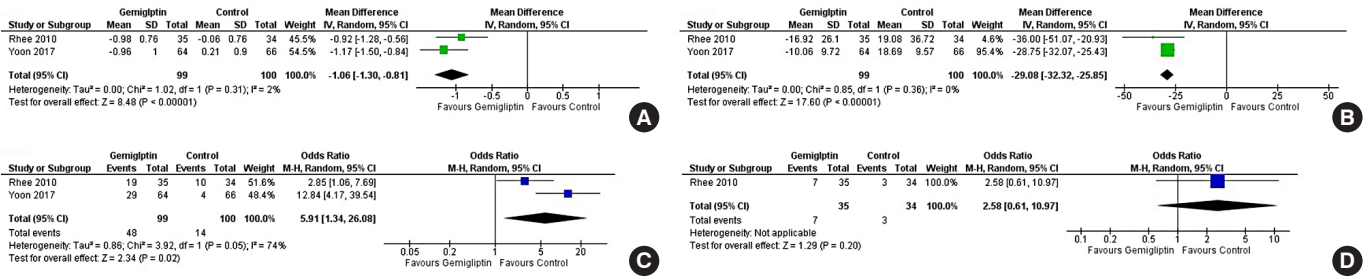

**Supplemental Fig. S2.** Forest plot highlighting the impact of gemigliptin as compared to the passive control group, after 12 weeks of therapy on (A) haemoglobin A1c (HbA1c), (B) fasting glucose, (C) the percent of people achieving HbA1c <7%, (D) the percent of people achieving HbA1c less than 6.5%. SD, standard deviation; IV, inverse variance; CI, confidence interval; M-H, Mantel-Haenszel.
