# Supplementary material for: Efficacy and Safety of the Novel Dipeptidyl Peptidase-4 Inhibitor Gemigliptin in the Management of Type 2 Diabetes: A Meta-Analysis
Source: PubMed Central journal article supplement — Endocrinol Metab (Seoul). 2021 Apr 6;36(2):374–87. doi: 10.3803/EnM.2020.818 (PMC8090470; doi:10.3803/enm.2020.818), 2021-04-06
Supplement: enm-2020-818-suppl4.pdf [file enm-2020-818-suppl4.pdf]

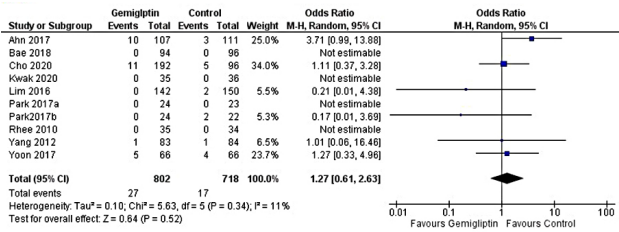

A

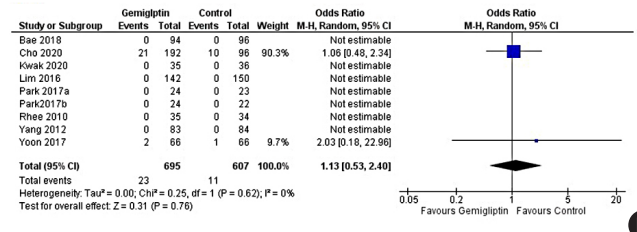

B

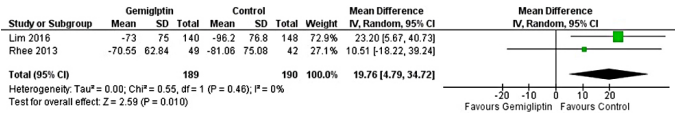

C

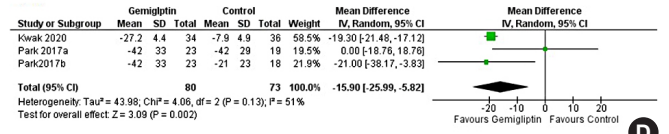

D

**Supplemental Fig. S3.** Forest plot highlighting the side effect profile of the use of gemigliptin as compared to controls focussing on (A) symptomatic hypoglycaemia, (B) asymptomatic hypoglycaemia, (C) post-prandial blood glucose (at 24 weeks), (D) mean average glucose excursion. M-H, Mantel-Haenszel; CI, confidence interval; SD, standard deviation; IV, inverse variance.
