# Supplementary material for: Efficacy and Safety of the Novel Dipeptidyl Peptidase-4 Inhibitor Gemigliptin in the Management of Type 2 Diabetes: A Meta-Analysis
Source: PubMed Central journal article supplement — Endocrinol Metab (Seoul). 2021 Apr 6;36(2):374–87. doi: 10.3803/EnM.2020.818 (PMC8090470; doi:10.3803/enm.2020.818), 2021-04-06
Supplement: enm-2020-818-suppl7.pdf [file enm-2020-818-suppl7.pdf]

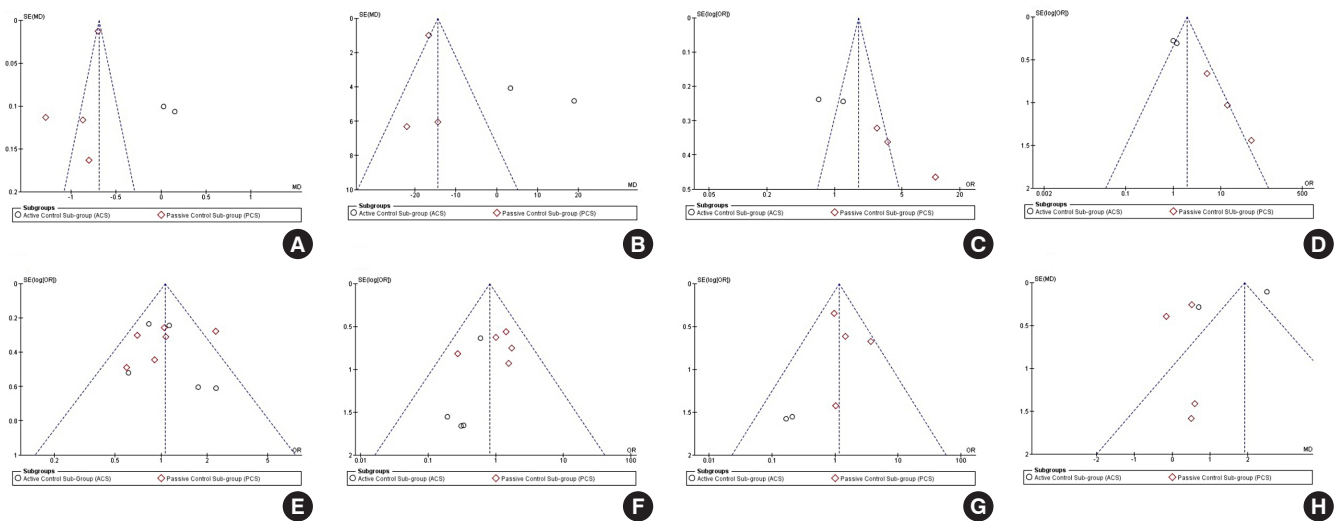

**Supplemental Fig. S6.** Funnel plot of all the included studies in the meta-analysis (assessing the publication bias) of the main outcomes assessed (A) haemoglobin A1c (HbA1c; 24 weeks), (B) fasting glucose (24 weeks), (C) HbA1c <7% (24 weeks), (D) HbA1c <6.5% (24 weeks), (E) total adverse events, (F) severe adverse events, (G) total hypoglycaemic episodes, (H) body weight. SE, standard error; MD, mean difference; OR, odds ratio.
